# Supplementary material
Source: Elsevier journal article supplement (https://www.sciencedirect.com/science/article/pii/S253006442100033X)

**Appendix S1.** Detection probability of Amazonian manatee in the *várzea* and *ria* lake in the Piagaçu-Purus SDR, modelled with datasets obtained using different sampling methods. The vertical bars correspond to the standard error of the estimates.


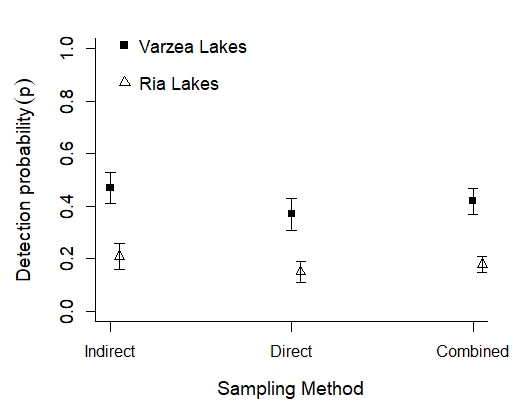

Supplement: mmc1 [file S253006442100033X:mmc1.docx]
