# Supplementary material
Source: Elsevier journal article supplement (https://www.sciencedirect.com/science/article/pii/S253006442100033X)

**Appendix S2.** Manatee detection probability as a function of macrophyte coverage (%) based on model averaging. Data obtained by combined sampling methods (active search and parallel transect). The dashed lines indicate 95% of confidence intervals.


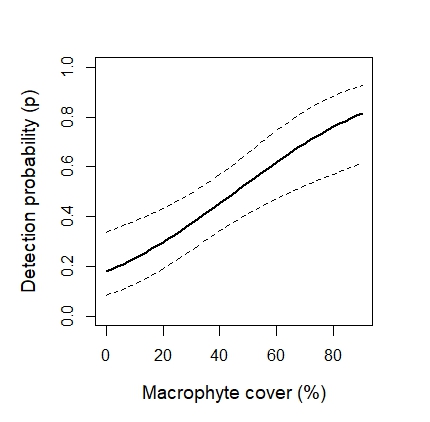

Supplement: mmc2 [file S253006442100033X:mmc2.docx]
