# Supplementary material
Source: Elsevier journal article supplement (https://www.sciencedirect.com/science/article/pii/S253006442100033X)

**Appendix S3.** Occupancy estimate of Amazonian manatee as a function of the distance of communities (km) based on model averaging. Data obtained by combined sampling methods (active search and transect). The dashed lines indicate 95% of confidence intervals.


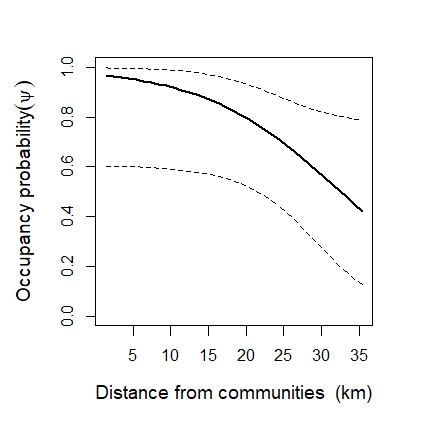

Supplement: mmc3 [file S253006442100033X:mmc3.docx]
