# Supplementary material
Source: Elsevier journal article supplement (https://www.sciencedirect.com/science/article/pii/S253006442100033X)
Supplement: mmc4 [file S253006442100033X:mmc4.docx]

**Appendix S4.** Model selection results of the independent approach for sampling method comparison. Detection probability was modelled as a function of habitat (*várzea* or *ria* lake) and method (direct or indirect) while occupancy (ψ) was kept constant. Models with ΔAIC <2 indicate best fitted for data.

|  |  |  |  |  | ***p Indirect*** | | ***p Direct*** | |
| --- | --- | --- | --- | --- | --- | --- | --- | --- |
| ***Models*** | ***K*** | ***AIC*** | ***∆AIC*** | ***ωAIC*** | ***ria (SE)*** | ***várzea (SE)*** | ***ria (SE)*** | ***várzea (SE)*** |
| *Ψ (.) p (Habitat)* | 3 | 268.72 | 0.00 | 0.54 | 0.18 (0.03) | 0.42 (0.05) | 0.18 (0.03) | 0.42 (0.05) |
| *Ψ (.) p (Habitat + Method)* | 4 | 269.11 | 0.39 | 0.44 | 0.21 (0.05) | 0.47 (0.06) | 0.15 (0.04) | 0.37 (0.06) |
| *Ψ (.) p (.)* | 2 | 278.42 | 9.70 | 0.00 | 0.29 (0.04) | 0.29 (0.04) | 0.29 (0.04) | 0.29 (0.04) |
| *Ψ (.) p (Method)* | 3 | 278.91 | 10.19 | 0.00 | 0.33 (0.05) | 0.33 (0.05) | 0.25 (0.04) | 0.25 (0.04) |

Note: K: number of parameters; AIC: adjustment of the Akaike information criterion; ΔAIC: difference between AIC values of each model in relation to the model with lower AIC value; ωAIC: model weight; SE: standard error.
