# Supplementary material
Source: Elsevier journal article supplement (https://www.sciencedirect.com/science/article/pii/S253006442100033X)
Supplement: mmc6 [file S253006442100033X:mmc6.xlsx]

## Sheet: Planilha1
VARIABLE
Perimeter of sample site (km)		Results
	H =	3.1426
	DEGREES OF FREEDOM =	3
	(p) Kruskal-Wallis =	0.3702
Macrophyte cover (%)		Results
	H =	1.4882
	DEGREES OF FREEDOM =	3
	(p) Kruskal-Wallis =	0.685
Water transparency (cm)	DUMM	Results
	H =	50.4986					ago	set	out	nov
	DEGREES OF FREEDOM =	3				Results	- 1 -	- 2 -	- 3 -	- 4 -
	(p) Kruskal-Wallis =	< 0.0001				Sample size =	33	33	33	33
	R 1 =	3259.5				Mean =	151.273	126.606	87.7273	95.6667
	R 2 =	2612.5				Standard deviation =	37.2678	30.822	31.9064	20.325
	R 3 =	1333				W =	0.9539	0.9145	0.8795	0.9614
	R 4 =	1573				p =	0.2835	0.0177	0.0097	0.3992
	R 1 (posto médio) =	98.7727
	R 2 (posto médio) =	79.1667
	R 3 (posto médio) =	40.3939
	R 4 (posto médio) =	47.6667
	Comparações (método de Dunn)	Dif. Postos	z calculado	z crítico	p
	Postos médios 1 e 2	19.6061	2.0821	2.635	ns
	Postos médios 1 e 3	58.3788	6.1998	2.635	< 0.05
	Postos médios 1 e 4	51.1061	5.4274	2.635	< 0.05
	Postos médios 2 e 3	38.7727	4.1176	2.635	< 0.05
	Postos médios 2 e 4	31.5	3.3453	2.635	< 0.05
	Postos médios 3 e 4	7.2727	0.7724	2.635	ns
Water depth (m)	DUMM	Results
	H =	72.3378					ago	set	out	nov
	DEGREES OF FREEDOM =	3				Results	- 1 -	- 2 -	- 3 -	- 4 -
	(p) Kruskal-Wallis =	< 0.0001				Sample size =	33	33	33	33
	R 1 =	3631				Mean =	9.8303	7.103	5.0303	5.8394
	R 2 =	2365				Standard deviation =	1.603	1.4658	1.6905	1.7461
	R 3 =	1159.5				W =	0.9493	0.9665	0.9179	0.9388
	R 4 =	1622.5				p =	0.213	0.4773	0.0219	0.0855
	R 1 (posto médio) =	110.03
	R 2 (posto médio) =	71.6667
	R 3 (posto médio) =	35.1364
	R 4 (posto médio) =	49.1667
	Comparações (método de Dunn)	Dif. Postos	z calculado	z crítico	p
	Postos médios 1 e 2	38.3636	4.0742	2.635	< 0.05
	Postos médios 1 e 3	74.8939	7.9537	2.635	< 0.05
	Postos médios 1 e 4	60.8636	6.4636	2.635	< 0.05
	Postos médios 2 e 3	36.5303	3.8795	2.635	< 0.05
	Postos médios 2 e 4	22.5	2.3895	2.635	ns
	Postos médios 3 e 4	14.0303	1.49	2.635	ns
