# Supplementary material
Source: Elsevier journal article supplement (https://www.sciencedirect.com/science/article/pii/S253006442100033X)

**Appendix S8.** Sampling methods used to detect Amazonian manatees. a) Active visual search for individuals while following random navigation routes; b) Direct evidence of manatees breathing at the surface; c) Parallel transects from the margin to find indirect evidence of manatee presence; d) fresh scars on aquatic vegetation and e) floating feces of the species.

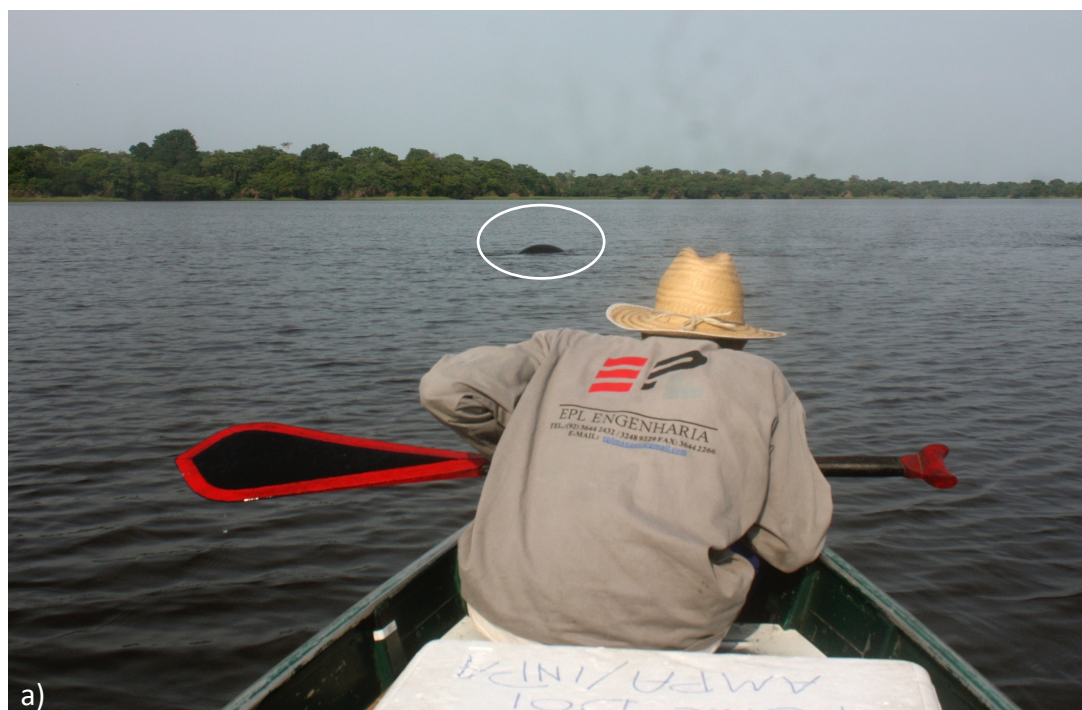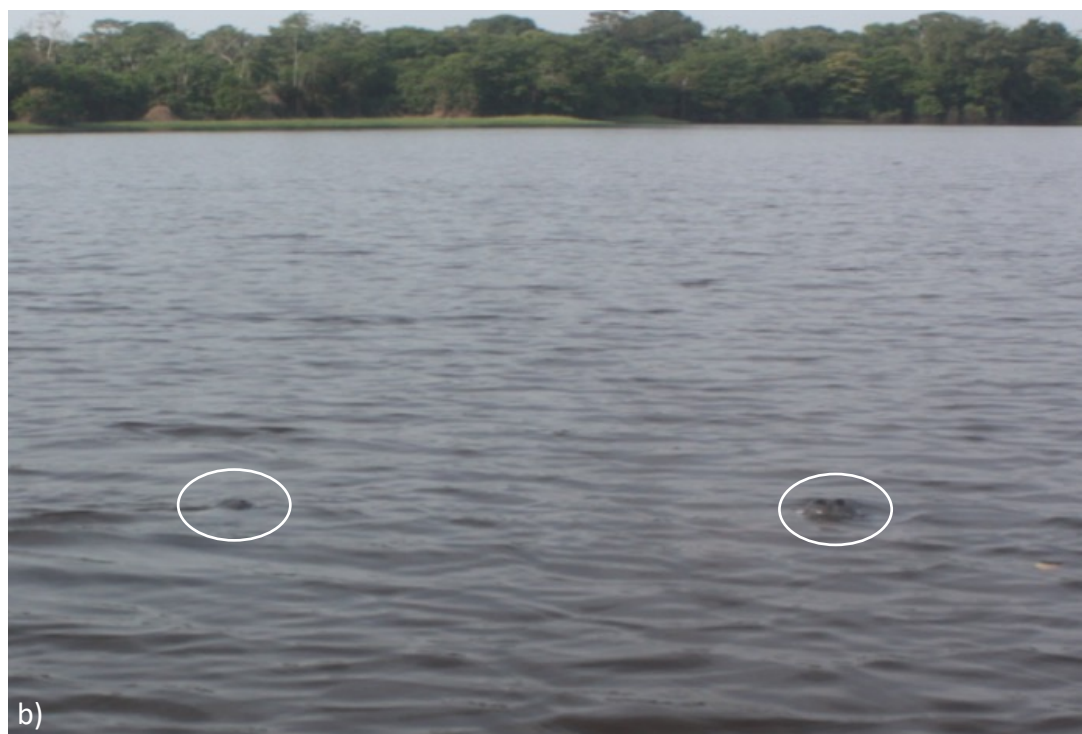

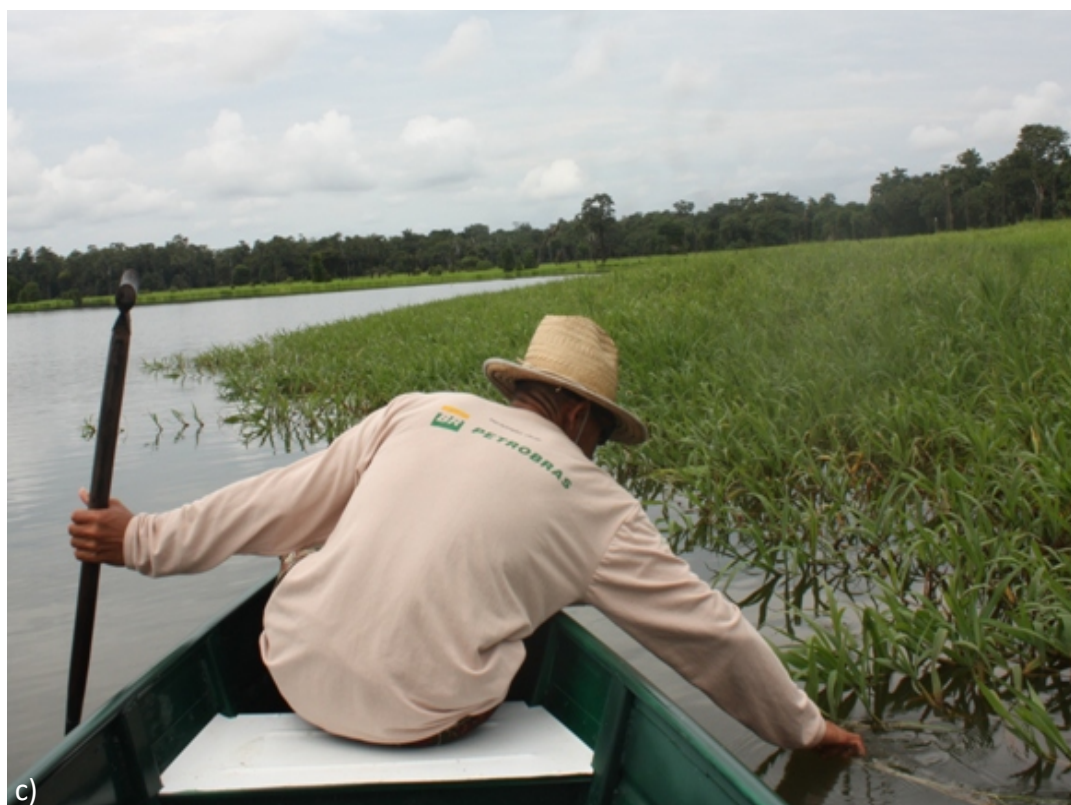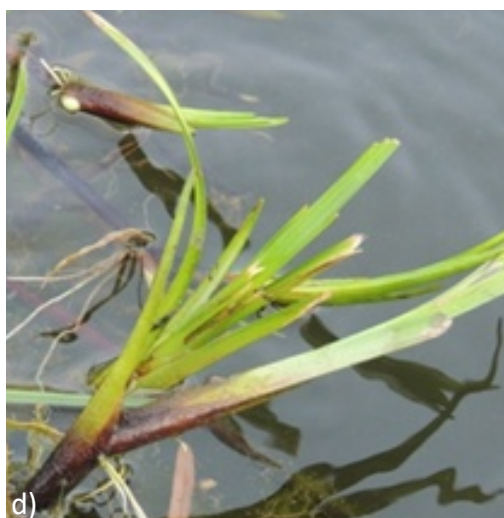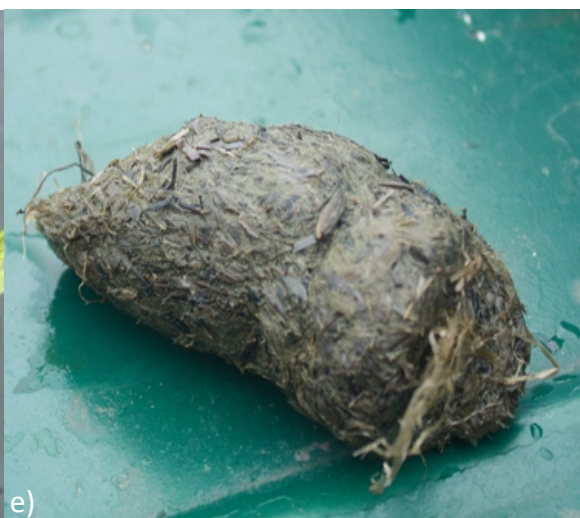

Supplement: mmc8 [file S253006442100033X:mmc8.pdf]
