# Supplementary material
Source: Elsevier journal article supplement (https://www.sciencedirect.com/science/article/pii/S253006442100033X)

**Appendix S9.** Pictures of the study region showing the two aquatic landscapes: a) and b) floodplain lake; c) and d) “ponds” in ria lake.

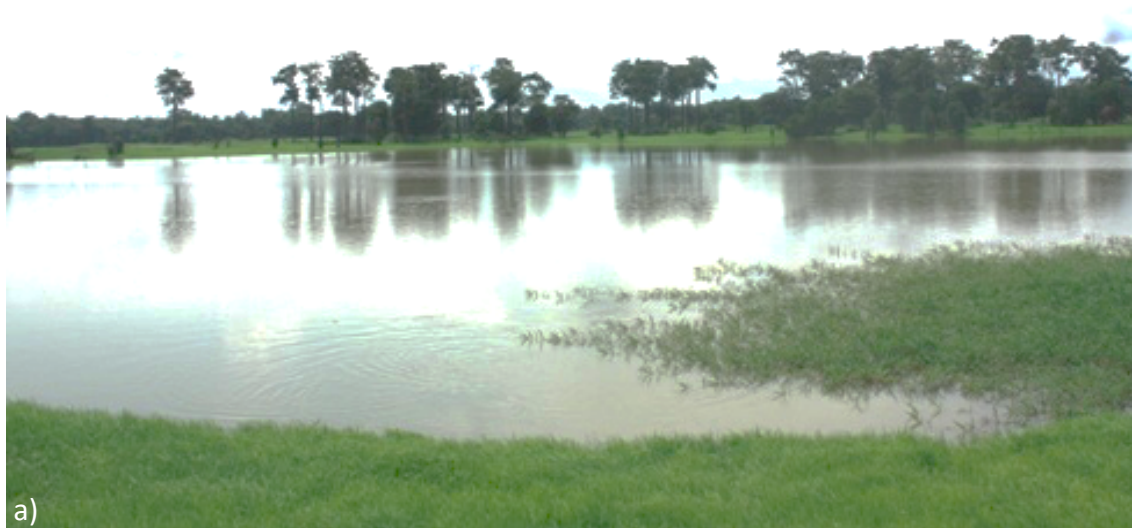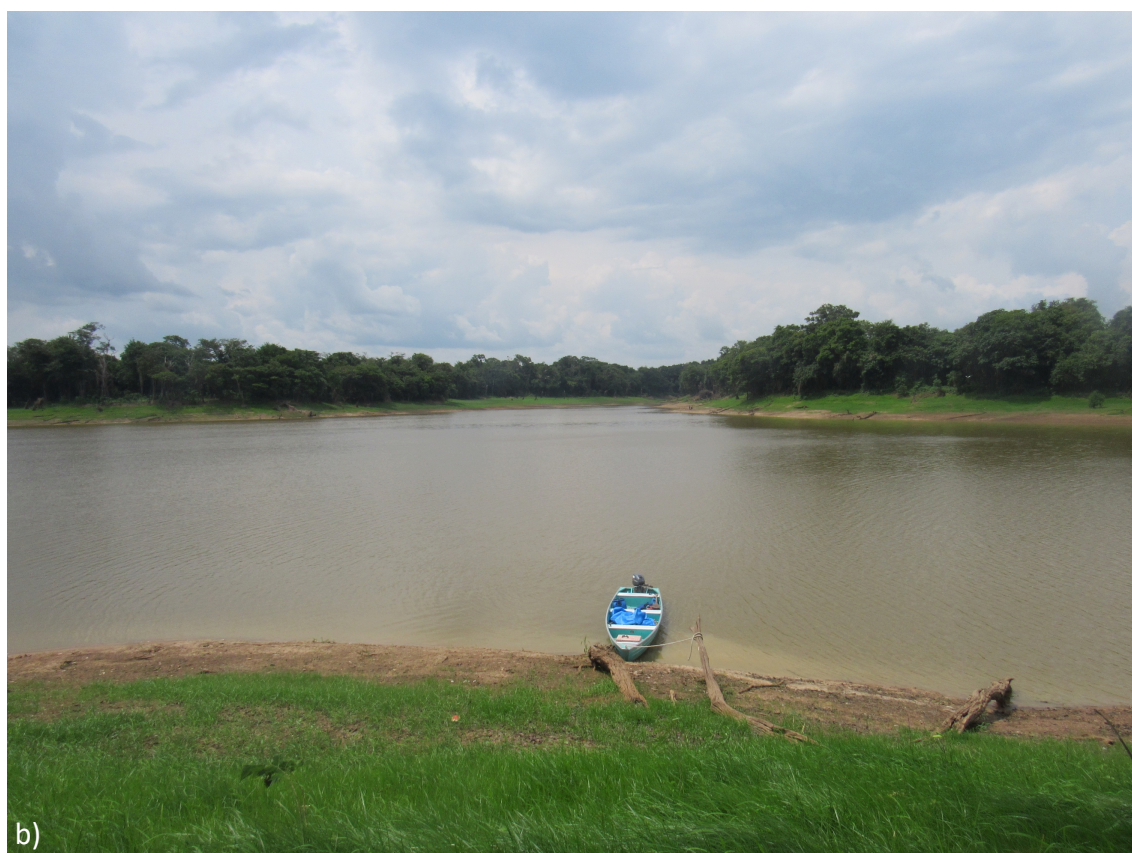



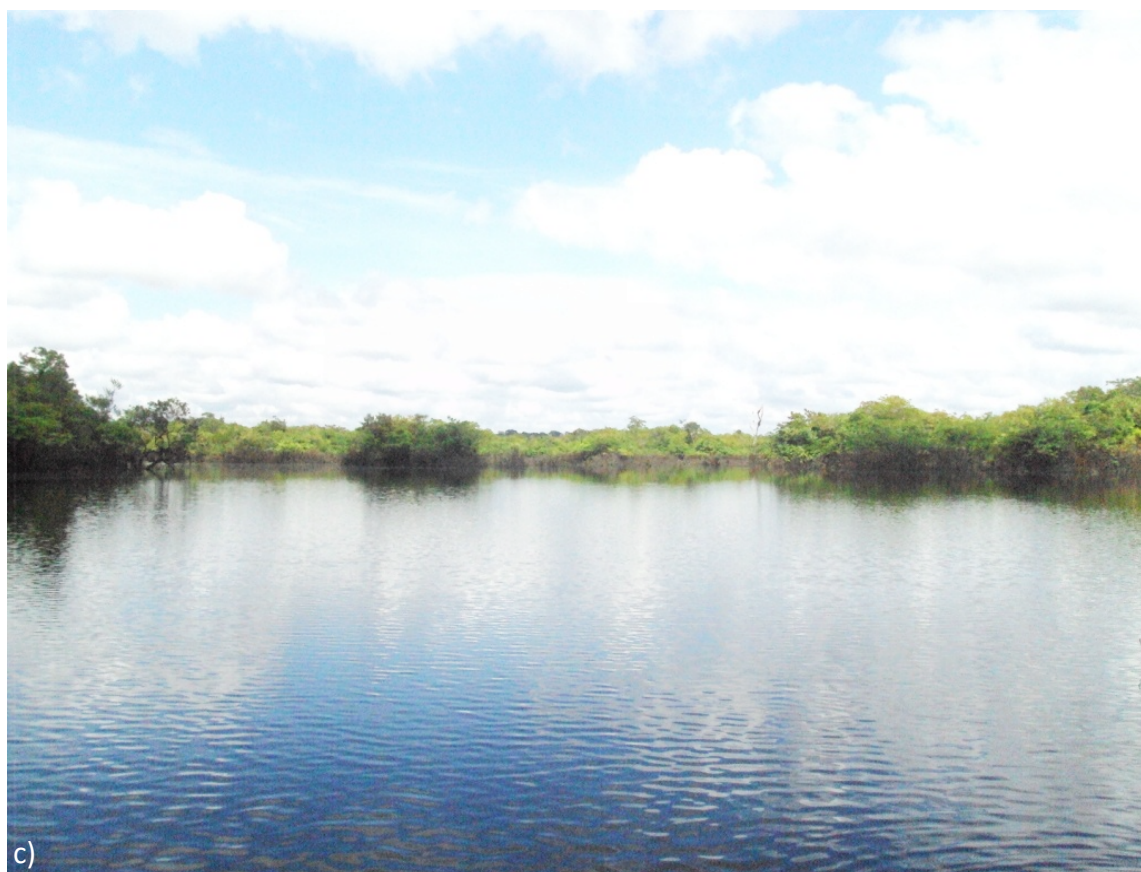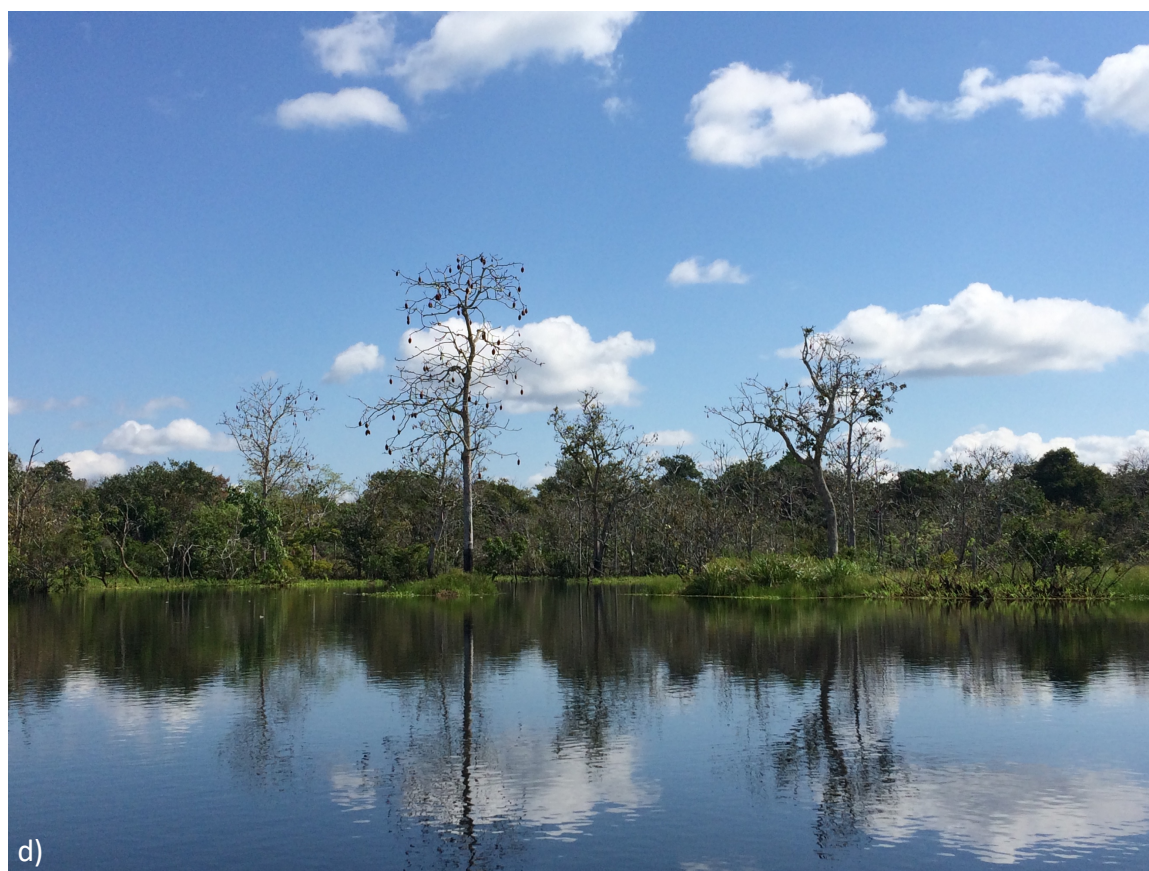

Supplement: mmc9 [file S253006442100033X:mmc9.pdf]
