# Supplementary material
Source: Elsevier journal article supplement (https://www.sciencedirect.com/science/article/pii/S253006442100033X)

**Appendix S10.** Graphical correlation matrix between the occupancy variables: distance to the community (*DistCom*),distance to the protection zone (*DistProt*) and macrophyte cover (*Cover*)**.**


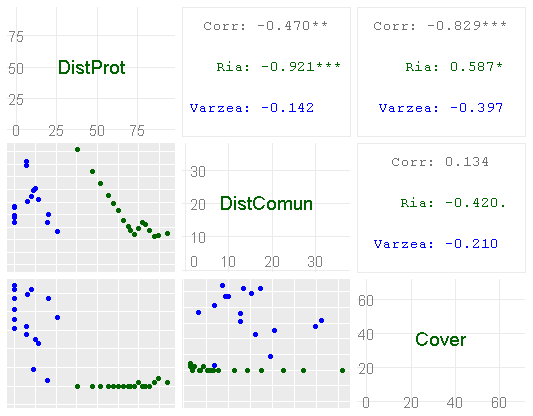

Supplement: mmc10 [file S253006442100033X:mmc10.docx]
