# Supplementary material
Source: Elsevier journal article supplement (https://www.sciencedirect.com/science/article/pii/S253006442100033X)
Supplement: mmc11 [file S253006442100033X:mmc11.docx]

**Appendix S11.** a) Total occupancy of Amazonian manatee and b) detection probability of species by visit in the sample site.


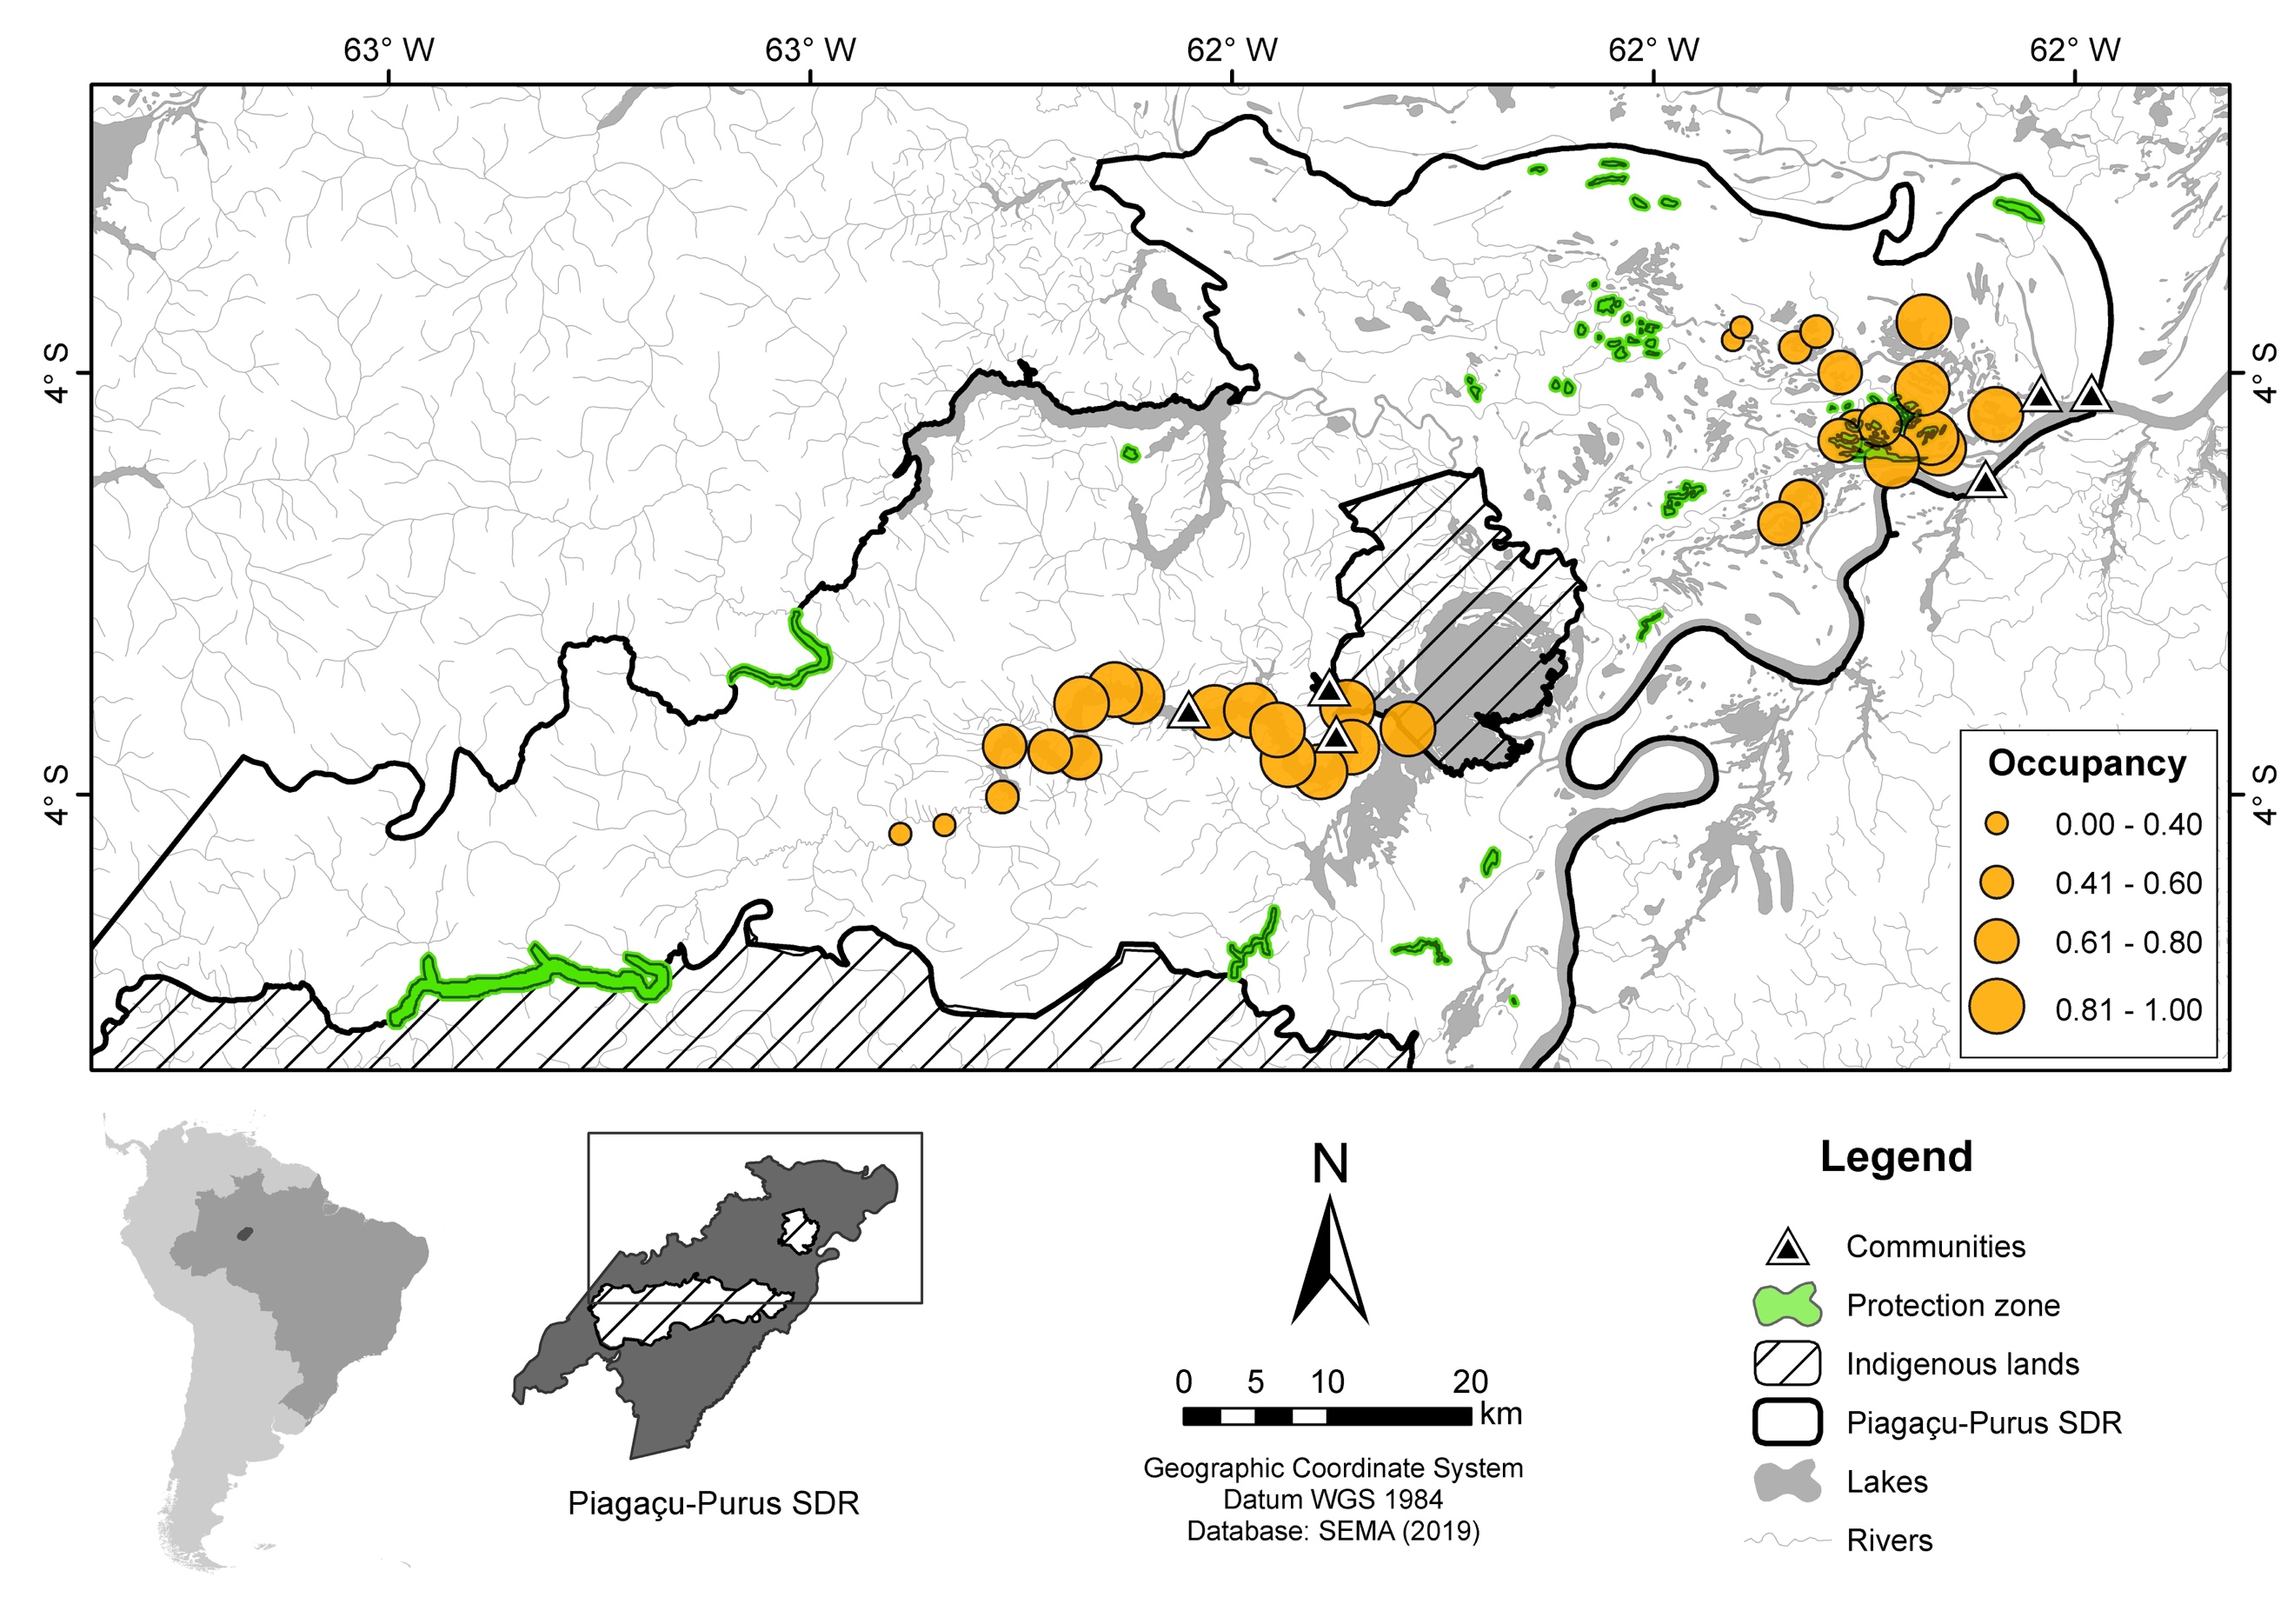


a)


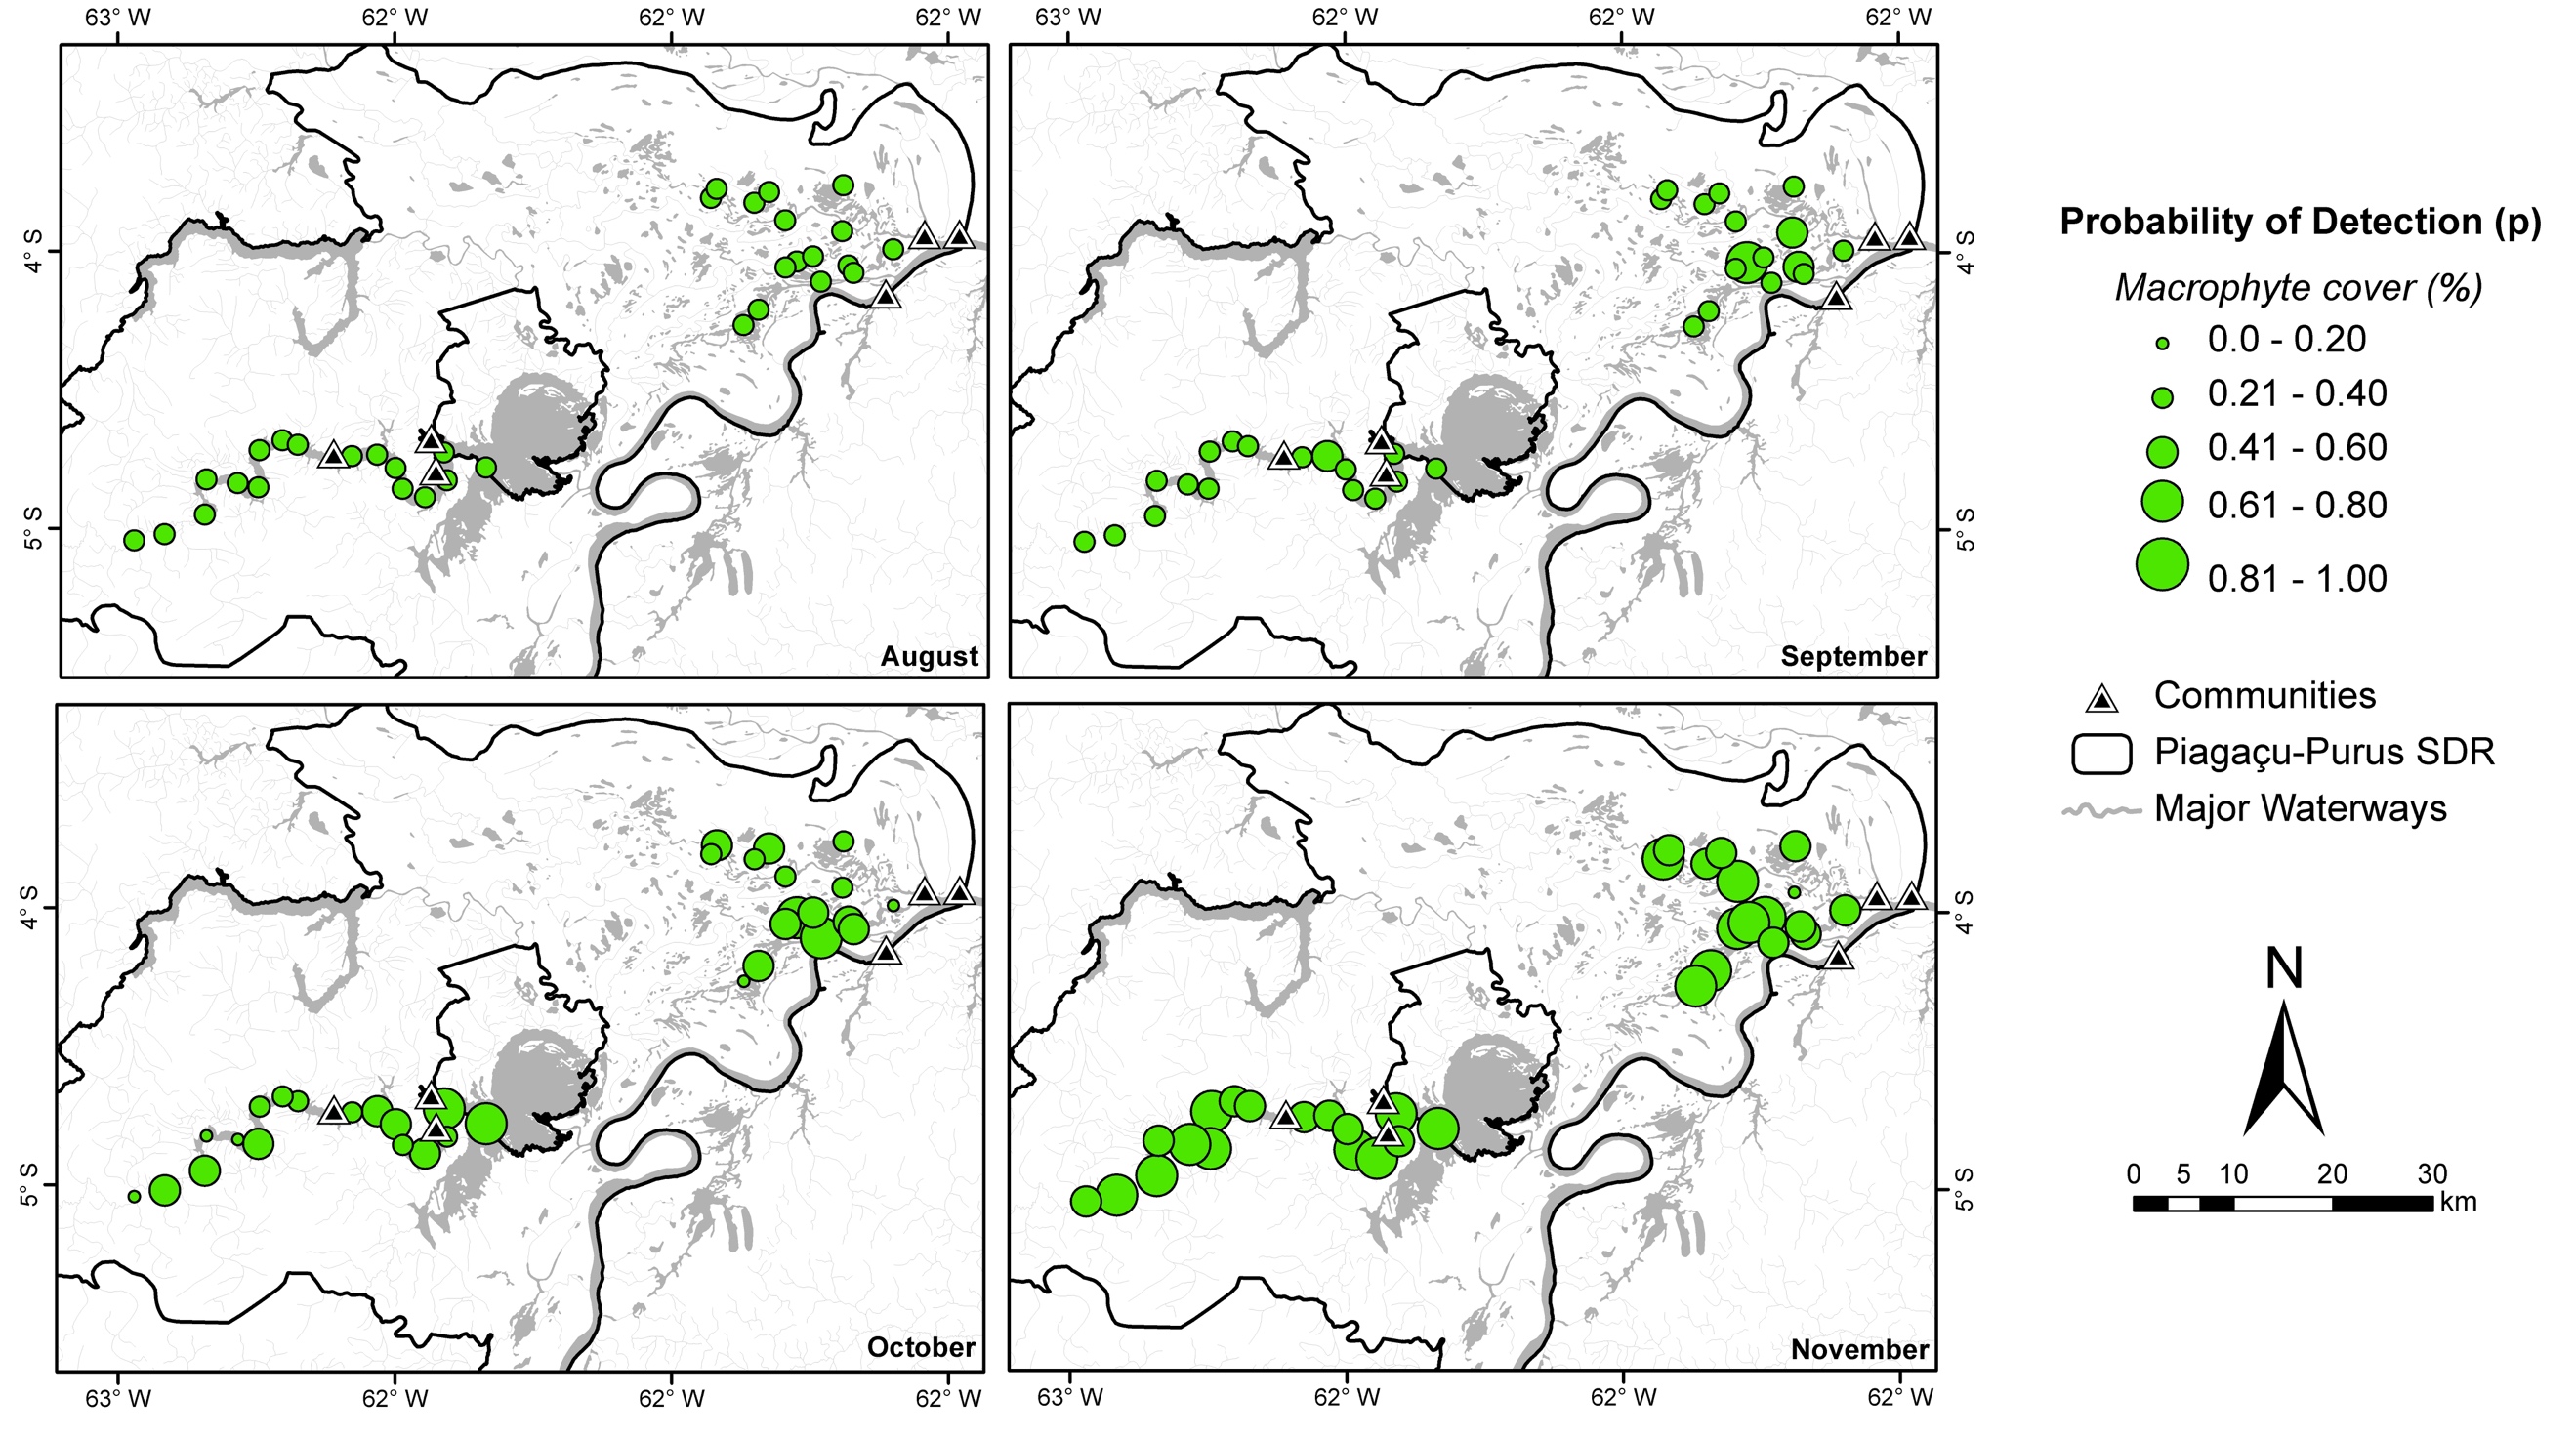


b)
