# Supplementary material
Source: Elsevier journal article supplement (https://www.sciencedirect.com/science/article/pii/S253006442100033X)
Supplement: mmc12 [file S253006442100033X:mmc12.xlsx]

## Sheet: Planilha2
SITE	HABITAT CATEGORY	VISIT 1 - AUGUST					VISIT 2 - SEPTEMBER					VISIT 3 - OCTOBER					VISIT 4 - NOVEMBER					Occupancy History Combined Methods
		EVIDENCE					EVIDENCE					EVIDENCE					EVIDENCE
		INDIRECT			DIRECT	COMBINED	INDIRECT			DIRECT	COMBINED	INDIRECT			DIRECT	COMBINED	INDIRECT			DIRECT	COMBINED
		Feeding traces	Feces	Acoustic	Active search		Feeding traces	Feces	Acoustic	Active search		Feeding traces	Feces	Acoustic	Active search		Feeding traces	Feces	Acoustic	Active search
1	Ria lake	0	0	0	0	0	0	0	0	0	0	0	0	0	1	1	0	0	0	0	0	0010
2	Ria lake	0	0	0	0	0	0	0	0	0	0	0	0	0	1	1	0	0	0	0	0	0010
3	Ria lake	0	0	0	0	0	0	0	0	0	0	0	1	0	1	1	0	0	0	0	0	0010
4	Ria lake	0	0	0	0	0	0	0	1	1	1	0	0	0	1	1	0	0	0	0	0	0110
5	Ria lake	0	0	0	1	1	0	0	0	0	0	0	0	1	1	1	0	0	0	1	1	1011
6	Ria lake	0	0	0	0	0	0	0	0	0	0	0	0	0	0	0	0	0	0	0	0	0000
7	Ria lake	0	0	0	0	0	0	0	0	0	0	0	0	0	0	0	0	0	0	0	0	0000
8	Ria lake	0	0	0	0	0	0	0	0	0	0	0	0	0	0	0	0	0	0	0	0	0000
9	Ria lake	0	0	1	1	1	0	0	0	0	0	0	0	0	1	1	0	0	0	1	1	1011
10	Ria lake	0	0	0	0	0	0	1	0	0	1	0	0	0	0	0	0	0	0	0	0	0100
11	Ria lake	0	0	0	0	0	0	0	0	0	0	0	0	0	1	1	0	0	0	1	1	0011
12	Ria lake	0	0	0	0	0	0	0	0	0	0	0	0	0	0	0	0	1	0	0	1	0001
13	Ria lake	0	0	0	0	0	0	0	0	0	0	0	0	0	0	0	0	0	0	1	1	0001
14	Ria lake	0	0	0	0	0	0	0	0	1	1	0	0	0	0	0	0	0	0	0	0	0100
15	Ria lake	0	0	0	0	0	0	0	0	1	1	0	0	0	0	0	0	0	0	0	0	0100
16	Ria lake	0	0	0	0	0	0	0	1	0	1	0	0	0	0	0	0	0	0	0	0	0100
17	Ria lake	0	0	0	0	0	0	0	0	0	0	0	0	0	0	0	0	0	0	0	0	0000
18	Floodplain lake	0	0	0	0	0	1	0	0	0	1	0	0	0	0	0	0	0	0	0	0	0100
19	Floodplain lake	1	0	0	0	1	1	0	0	0	1	0	1	0	0	1	1	0	0	0	1	1111
20	Floodplain lake	0	0	0	0	0	0	0	0	0	0	0	0	0	0	0	0	0	0	0	0	0000
21	Floodplain lake	0	1	0	0	1	1	0	0	0	1	0	0	0	0	0	0	0	0	0	0	1100
22	Floodplain lake	0	0	0	0	0	0	0	0	0	0	0	0	0	0	0	0	0	0	0	0	0000
23	Floodplain lake	0	0	0	0	0	0	0	0	0	0	0	0	0	0	0	0	0	0	1	1	0001
24	Floodplain lake	0	0	0	0	0	0	0	0	0	0	0	0	0	0	0	0	0	0	0	0	0000
25	Floodplain lake	1	0	0	0	1	1	1	0	1	1	1	1	0	0	1	0	1	0	1	1	1111
26	Floodplain lake	1	0	0	0	1	0	0	0	0	0	1	0	1	1	1	1	0	0	1	1	1011
27	Floodplain lake	1	0	0	0	1	1	0	0	0	1	1	0	0	0	1	0	0	0	1	1	1111
28	Floodplain lake	1	0	0	1	1	1	0	0	0	1	0	0	0	0	0	1	0	0	0	1	1101
29	Floodplain lake	1	0	0	0	1	1	0	0	0	1	1	0	0	0	1	1	0	1	1	1	1111
30	Floodplain lake	0	0	0	0	0	1	0	0	1	1	1	0	0	1	1	1	0	0	0	1	0111
31	Floodplain lake	0	0	0	0	0	0	0	0	0	0	0	0	0	0	0	0	0	0	0	0	0000
32	Floodplain lake	1	0	0	0	1	0	0	0	0	0	0	0	0	0	0	0	0	0	0	0	1000
33	Floodplain lake	0	0	0	0	0	0	0	0	0	0	0	0	0	0	0	0	0	0	0	0	0000
