# Supplementary material
Source: Elsevier journal article supplement (https://www.sciencedirect.com/science/article/pii/S253006442100033X)
Supplement: mmc13 [file S253006442100033X:mmc13.docx]

**Appendix S13.** List of aquatic plants consumed by the Amazonian manatee in the study area. Habit of plants according to Guterrez-Pazin et al., (2014): FF= Fixed floating; E= Emergent; A= Amphibious.

| **Family** | **Species** | **Common name** | **Number of evidences** | **Frequency (%)** |
| --- | --- | --- | --- | --- |
| Poaceae | *Paspalum repens* (FF) | Membeca | 27 | 64.3 |
|  | *Oriza glandiglumis* (E) | Arroz | 4 | 9.5 |
| Cyperaceae | *Eleocharis subarticulata* (E, A) | Piprioca | 11 | 26.2 |
| **Total** |  |  | 42 | 100 |
